# Supplementary material
Source: PubMed Central journal article supplement (PMC3075037)
Supplement: supp_00997.2010_tablelegs.pdf [file supp_00997.2010_tablelegs.pdf]

## SUPPLEMENTAL TABLE LEGENDS

1

2 Supplemental Table S1. **S-nitrosylated proteins/peptides from non-GSNO-treated heart**  
3 **homogenates as identified via SNO-RAC proteomic analysis with a false discovery rate of**  
4 **1%**. LC-MS/MS derived peptide sequences and MASCOT MS/MS search identifications.  
5 Peptide identifications with ion scores below 25 were not accepted; non-cysteine containing  
6 peptides were filtered from the data set. To view peptide sequences, click on the '+' symbol  
7 found on the left side of the spreadsheet. Each of 4 biological replicates was run in triplicate in  
8 order to increase protein/peptide identifications; replicates are identified in column headings as  
9 A2 (Heart 1), B2 (Heart 2), C2 (Heart 3), and D2 (Heart 4).

10

11 Supplemental Table S2. **S-nitrosylated proteins/peptides from GSNO-treated heart**  
12 **homogenates as identified via SNO-RAC proteomic analysis with a false discovery rate of**  
13 **1%**. LC-MS/MS derived peptide sequences and MASCOT MS/MS search identifications.  
14 Peptide identifications with ion scores below 25 were not accepted; non-cysteine containing  
15 peptides were filtered from the data set. To view peptide sequences, click on the '+' symbol  
16 found on the left side of the spreadsheet. Each of 4 biological replicates was run in triplicate in  
17 order to increase protein/peptide identifications; replicates are identified in column headings as  
18 A2 (Heart 1), B2 (Heart 2), C2 (Heart 3), and D2 (Heart 4).
